# Supplementary material for: Evaluation of Social Media Utilization by Latino Adolescents: Implications for Mobile Health Interventions
Source: PubMed Central journal article supplement (PMC4704907; doi:10.2196/mhealth.4374), 2015-09-29
Supplement: mhealth_v3i3e89_app1.pdf [file mhealth_v3i3e89_app1.pdf]

| Variables                    |                  | Sex            |                |                |                |                |                | Acculturation                      |                                   |                                   |                                  |                |                                    |                                   |                                   |                                  |                |
|------------------------------|------------------|----------------|----------------|----------------|----------------|----------------|----------------|------------------------------------|-----------------------------------|-----------------------------------|----------------------------------|----------------|------------------------------------|-----------------------------------|-----------------------------------|----------------------------------|----------------|
|                              |                  | T1             |                |                | T2             |                |                | T1                                 |                                   |                                   |                                  |                | T2                                 |                                   |                                   |                                  |                |
|                              |                  | Men, n/N (%)   | Women, n/N (%) | <i>P</i> value | Men, n/N (%)   | Women, n/N (%) | <i>P</i> value | High Latino-high American, n/N (%) | Low Latino-high American, n/N (%) | High Latino-low American, n/N (%) | Low Latino-low American, n/N (%) | <i>P</i> value | High Latino-high American, n/N (%) | Low Latino-high American, n/N (%) | High Latino-low American, n/N (%) | Low Latino-low American, n/N (%) | <i>P</i> value |
|                              |                  |                |                |                |                |                |                |                                    |                                   |                                   |                                  |                |                                    |                                   |                                   |                                  |                |
| Cell phone access (yes)      |                  | 202/226 (89.4) | 286/324 (88.3) | .69            | 190/216 (88.0) | 304/321 (94.7) | .005           | 245/275 (89.1)                     | 110/120 (91.7)                    | 93/111 (83.8)                     | 15/17 (88.2)                     | .29            | 267/287 (93.0)                     | 113/123 (91.9)                    | 86/99 (86.9)                      | 18/18 (100.0)                    | .14            |
| <b>Cell phone activities</b> |                  |                |                |                |                |                |                |                                    |                                   |                                   |                                  |                |                                    |                                   |                                   |                                  |                |
|                              | Email            | 141/190 (74.2) | 193/276 (69.9) | .31            | 163/186 (87.6) | 264/299 (88.3) | .83            | 182/243 (74.9)                     | 75/105 (71.4)                     | 56/87 (64.4)                      | 10/12 (83.3)                     | .23            | 240/264 (90.9)                     | 97/111 (87.4)                     | 69/84 (82.1)                      | 14/17 (82.4)                     | .14            |
|                              | Pictures         | 180/194 (92.8) | 271/282 (96.1) | .11            | 181/187 (96.8) | 296/302 (98.0) | .4             | 234/243 (96.3)                     | 101/109 (92.7)                    | 85/91 (93.4)                      | 14/14 (100.0)                    | .35            | 261/265 (98.5)                     | 105/119 (95.5)                    | 83/86 (96.5)                      | 18/18 (100.0)                    | .29            |
|                              | Listen to music  | 187/200 (93.5) | 258/282 (91.5) | .41            | 184/190 (96.8) | 291/302 (96.4) | .78            | 224/243 (92.2)                     | 101/110 (91.8)                    | 84/92 (91.3)                      | 14/15 (93.3)                     | .99            | 261/267 (97.8)                     | 107/112 (95.5)                    | 79/85 (92.9)                      | 18/18 (100.0)                    | .15            |
|                              | Instant Messages | 176/194 (90.7) | 262/280 (93.6) | .25            | 183/188 (97.3) | 286/301 (95.0) | .21            | 231/243 (95.1)                     | 98/109 (89.9)                     | 79/88 (89.8)                      | 14/14 (100.0)                    | .13            | 259/267 (97.0)                     | 106/111 (95.5)                    | 79/85 (92.9)                      | 18/18 (100.0)                    | .3             |
|                              | Record Videos    | 151/191 (79.1) | 230/276 (83.3) | .24            | 159/184 (86.4) | 268/294 (91.2) | .1             | 205/242 (84.7)                     | 88/106 (83.0)                     | 63/86 (73.3)                      | 12/15 (80.0)                     | .12            | 243/263 (92.4)                     | 89/109 (81.7)                     | 72/81 (88.9)                      | 16/16 (94.1)                     | .02            |

|                                              |                 |                       |                    |     |                       |                       |      |                                |                               |                            |                  |     |                            |                            |                            |                  |      |
|----------------------------------------------|-----------------|-----------------------|--------------------|-----|-----------------------|-----------------------|------|--------------------------------|-------------------------------|----------------------------|------------------|-----|----------------------------|----------------------------|----------------------------|------------------|------|
|                                              | Play games      | 163/19<br>5<br>(83.6) | 231/27<br>5 (84.0) | .91 | 162/1<br>86<br>(87.1) | 250/2<br>92<br>(85.6) | .65  | 209/240<br>(87.1)              | 87/108<br>(80.6)              | 71/89<br>(79.8)            | 12/14<br>(85.7)  | .28 | 236/2<br>63<br>(89.7)      | 90/109<br>(82.6)           | 65/81<br>(80.3)            | 16/18<br>(88.9)  | .09  |
|                                              | Access Internet | 178/19<br>6<br>(90.8) | 252/283<br>(89.1)  | .53 | 183/1<br>88<br>(97.3) | 291/3<br>00<br>(97.0) | .83  | 220/243<br>(90.5)              | 98/110<br>(89.1)              | 80/91<br>(87.9)            | 14/15<br>(93.3)  | .86 | 259/2<br>65<br>(97.7)      | 107/11<br>1<br>(96.4)      | 81/85<br>(95.3)            | 18/18<br>(100.0) | .56  |
| Mean number of activities on cell phone (SD) |                 | 5.8<br>(0.12)         | 6.0<br>(0.09)      | .19 | 6.3<br>(0.10)         | 6.3<br>(0.09)         | .45  | 6.1<br>(1.45) <sup>a</sup>     | 5.9<br>(1.73)                 | 5.6<br>(1.60) <sup>a</sup> | 6.0 (1.20)       | .02 | 6.5<br>(1.07) <sup>a</sup> | 6.0<br>(1.43) <sup>a</sup> | 5.9<br>(1.51) <sup>a</sup> | 6.46<br>(0.66)   | .009 |
| SMS use                                      |                 | 188/20<br>2<br>(93.1) | 279/28<br>6 (97.6) | .02 | 188/1<br>90<br>(99.0) | 298/3<br>03<br>(98.4) | .59  | 236/245<br>(96.3)              | 105/11<br>0 (95.5)            | 91/93<br>(97.9)            | 15/15<br>(100.0) | .7  | 264/2<br>67<br>(98.9)      | 111/11<br>3<br>(98.2)      | 83/85<br>(97.7)            | 18/18<br>(100.0) | .79  |
| Send/receive more than 100 SMS/day           |                 | 53/178<br>(29.8)      | 96/260<br>(36.9)   | .12 | 45/18<br>8<br>(23.9)  | 90/29<br>6<br>(30.4)  | .12  | 77/224<br>(34.4)               | 40/101<br>(39.6)              | 21/83<br>(25.3)            | 6/14<br>(42.9)   | .2  | 83/26<br>4<br>(31.4)       | 22/111<br>(19.8)           | 23/81<br>(28.4)            | 4/18<br>(22.2)   | .14  |
| SMS parents at least once/day                |                 | 84/175<br>(48.0)      | 155/27<br>3 (56.8) | .07 | 84/18<br>5<br>(45.4)  | 176/2<br>96<br>(59.5) | .003 | 129/233<br>(55.4)              | 50/101<br>(49.5)              | 44/87<br>(50.6)            | 5/13<br>(38.5)   | .52 | 147/2<br>61<br>(56.3)      | 56/110<br>(50.9)           | 38/83<br>(45.8)            | 11/17<br>(64.7)  | .26  |
| SMS friends at least once/day                |                 | 156/18<br>2<br>(85.7) | 247/27<br>8 (88.9) | .32 | 157/1<br>88<br>(83.5) | 261/2<br>98<br>(87.6) | .21  | 213/234<br>(91.0) <sup>a</sup> | 88/105<br>(83.8) <sup>a</sup> | 77/90<br>(85.6)            | 9/13<br>(69.2)   | .04 | 225/2<br>64<br>(85.2)      | 89/111<br>(80.2)           | 77/83<br>(92.8)            | 17/18<br>(94.4)  | .06  |
| SMS boy/girlfriend at least once/day         |                 | 124/17<br>5<br>(70.9) | 159/26<br>2 (60.7) | .03 | 135/1<br>83<br>(73.8) | 187/2<br>86<br>(65.4) | .056 | 139/227<br>(61.2)              | 65/99<br>(65.7)               | 57/85<br>(67.1)            | 12/14<br>(85.7)  | .25 | 173/2<br>57<br>(67.3)      | 65/106<br>(61.3)           | 63/81<br>(77.8)            | 14/17<br>(82.4)  | .06  |
| Internet use                                 |                 | 221/22<br>5<br>(98.2) | 312/32<br>5 (96.0) | .14 | 210/2<br>16<br>(97.2) | 319/3<br>21<br>(99.4) | .04  | 272/276<br>(98.6)              | 119/12<br>1 (98.4)            | 105/11<br>1 (94.6)         | 16/16<br>(100.0) | .1  | 284/2<br>87<br>(99.0)      | 122/12<br>3<br>(99.2)      | 96/99<br>(97.0)            | 17/18<br>(94.4)  | .23  |



|                                                             |                       |                |                |      |                |                |      |                |               |               |              |     |                |               |              |              |      |
|-------------------------------------------------------------|-----------------------|----------------|----------------|------|----------------|----------------|------|----------------|---------------|---------------|--------------|-----|----------------|---------------|--------------|--------------|------|
| ng activities                                               |                       |                |                |      |                |                |      |                |               |               |              |     |                |               |              |              |      |
|                                                             | Send instant messages | 172/202 (85.2) | 249/310 (80.3) | .16  | 164/203 (80.8) | 248/304 (81.6) | .82  | 227/265 (85.7) | 88/111 (79.3) | 82/102 (80.4) | 13/17 (76.5) | .34 | 223/276 (80.8) | 96/111 (86.5) | 73/95 (76.8) | 13/17 (76.5) | .32  |
|                                                             | Post comments         | 172/207 (83.1) | 268/315 (85.1) | .54  | 162/209 (77.5) | 263/311 (84.6) | .04  | 231/267 (86.5) | 93/112 (83.0) | 89/107 (83.2) | 13/16 (81.3) | .74 | 240/279 (86.0) | 83/116 (71.6) | 78/98 (79.6) | 15/17 (88.2) | .007 |
|                                                             | Send private messages | 145/206 (70.4) | 212/313 (67.7) | .52  | 139/205 (67.8) | 214/304 (70.4) | .53  | 189/267 (70.8) | 69/111 (62.2) | 74/105 (70.5) | 14/16 (87.5) | .14 | 192/276 (69.6) | 82/114 (71.9) | 63/93 (67.7) | 12/17 (70.6) | .93  |
|                                                             | Tag people            | 137/203 (67.5) | 250/309 (80.9) | .001 | 141/204 (69.1) | 244/306 (79.7) | .006 | 216/267 (80.9) | 83/110 (75.5) | 70/101 (69.3) | 10/16 (62.5) | .05 | 221/278 (79.5) | 77/112 (68.8) | 70/95 (73.7) | 11/17 (64.7) | .09  |
|                                                             | Post status updates   | 144/200 (72.0) | 247/308 (80.2) | .03  | 132/204 (64.7) | 222/301 (73.8) | .03  | 208/266 (78.2) | 79/107 (73.8) | 78/101 (77.2) | 12/16 (75.0) | .84 | 188/273 (68.9) | 80/113 (70.0) | 64/94 (68.1) | 15/17 (88.2) | .39  |
|                                                             | Post photos or videos | 175/204 (85.8) | 291/313 (93.0) | .007 | 171/206 (83.0) | 283/306 (92.5) | .001 | 250/268 (93.3) | 97/110 (88.2) | 92/104 (88.5) | 13/16 (81.3) | .15 | 252/277 (91.0) | 94/113 (83.2) | 85/96 (88.5) | 15/16 (93.8) | .15  |
| Mean number of activities on social networking site (SD)    |                       | 4.9 (0.13)     | 5.2 (0.09)     | .048 | 4.9 (0.15)     | 5.1 (0.11)     | .2   | 5.3 (1.56)     | 5.0 (1.86)    | 4.9 (1.81)    | 4.9 (2.38)   | .13 | 5.2 (1.57)     | 5.0 (1.78)    | 4.6 (1.85)   | 5.1 (2.06)   | .1   |
| Logging in to social networking sites one or more times/day |                       | 160/211 (75.8) | 257/316 (81.3) | .13  | 161/208 (77.4) | 265/311 (85.2) | .02  | 222/168 (82.8) | 85/112 (75.9) | 82/106 (77.4) | 13/17 (76.5) | .38 | 236/280 (84.3) | 90/115 (78.3) | 79/97 (81.4) | 12/17 (70.6) | .31  |

<sup>a</sup>Categories that are significantly different from each other.
